# Supplementary material for: Protective Mechanism of Rosa roxburghii Tratt Fermentation Broth against Ultraviolet-A-Induced Photoaging of Human Embryonic Skin Fibroblasts
Source: MDPI journal article supplement (doi:10.3390/antiox13030382), 2024-03-21
Supplement: s1 [file s1]

Supplementary material

Table S1: Primer sequences for RT-qPCR

| Gene         | Primer                                                                   |
|--------------|--------------------------------------------------------------------------|
| <i>actin</i> | F: GCG AGA AGA TGA CCCAGAT<br>R: ATC ACG ATG CCA GTGGTA                  |
| <i>TGF-β</i> | F: CAACCACCAGGGCATCCA<br>R: TCGTGGTCCCAGCACTCA                           |
| <i>TIMP</i>  | F: CTTTTCAGAGCCTTGGAGGAG<br>R: TGGGGACACCAGAAGTCAAC                      |
| <i>p38</i>   | F: TTAACAGGATGCCAAGCCATGA<br>R: GGCACCAATAAATACATTGCAAAG                 |
| <i>JNK</i>   | F: CTGTGTGGAATCAAGCACCTTCA<br>R: CTGGCCAGACCGAAGTCAAGA                   |
| <i>ERK2</i>  | F: 5'-TGTTCCCAAATGCTGACTCCAA-3'<br>R: 5'-TCGGGTCGTAATACTGCTCCAGATA-3'    |
| <i>c-Jun</i> | F: AAT AAC ACA GAG AGA CAG ACT TG<br>R: CTT GGA TAC CCT TGG CTT TAG      |
| <i>c-Fos</i> | F: GTG TGT ATT GTT CCC AGT GA<br>R: AGTTAATGC TAT GAG AAG ACT AAG G      |
| <i>Smad3</i> | F: GGCTGCTCT CCA ATG TCA<br>R: CAC TCTGCGAAG ACC TCC                     |
| <i>Smad7</i> | F: TTC CCT CCA AGAAGGATT TG<br>R: ACG AGT GTA TGA GTTGTAGAA G            |
| <i>MMP-1</i> | F: GCA TATCGA TGC TGC TCT TTC<br>R: GAT AAC CTGGAT CCA TAG ATC GTT       |
| <i>MMP-2</i> | F: GGA GGA GAAGGCTGT GTT<br>R: TAA AGG CGG CAT CCACTC                    |
| <i>MMP-3</i> | F: CAA AAC ATA TTT CTT TGT<br>AGAGGACAA<br>R: TTC AGC TAT TTG CTT GGGAAA |
| <i>MMP-9</i> | F: ATG TAC CCT ATG TAC CGC TTC<br>R: GTG TGG TGG TGG TTG GAG             |
| <i>Nrf2</i>  | F: CAACTCAGCACCTTGTATC<br>R: TTCTTAGTATCTGGCTTCTT                        |
| <i>HO1</i>   | F: CAAGCGCTATGTTTCAAGCGAC<br>R: GCTTGAAGTGGTGGCACTG                      |
| <i>CAT</i>   | F: CCTTCGACCCAAGCAA<br>R: CGATGGCGGTGAGTGT                               |
| <i>SOD</i>   | F: TGGAGATAATACAGCAGGCT<br>R: AGTCACATTGCCCAAGTCTC                       |

|                 |                                                    |
|-----------------|----------------------------------------------------|
| <i>GSH-Px</i>   | F: AGAAGTGCGAGGTGAACGGT<br>R: CCCACCAGGAACTTCTCAAA |
| <i>COL I:</i>   | F: GTGCTAAAGGTGCCAATGGT<br>R:GTGGGGAATGGCAAGCAAAA  |
| <i>COL III:</i> | F: CCAGGAGCTAACGGTCTCAG<br>R: CAGGGTTTCCATCTCTTCCA |

Table S2: Summary of differentially expressed genes

| group            | differentially<br>expressed genes | differentially<br>up-regulated<br>genes | differentially<br>down-regulated<br>genes |
|------------------|-----------------------------------|-----------------------------------------|-------------------------------------------|
| Control_vs_Model | 1117                              | 465                                     | 652                                       |
| Control_vs_RRT   | 1060                              | 326                                     | 734                                       |
| Model_vs_RRT     | 1933                              | 847                                     | 1086                                      |

Table S3: Top 20 summary table of GO annotation analysis results

| Term description                                 | Term type          | DEG_1 num |
|--------------------------------------------------|--------------------|-----------|
| immune system process                            | biological_process | 207       |
| reproductive process                             | biological_process | 201       |
| multicellular organismal process                 | biological_process | 385       |
| localization                                     | biological_process | 429       |
| developmental process                            | biological_process | 621       |
| response to stimulus                             | biological_process | 720       |
| metabolic process                                | biological_process | 851       |
| biological regulation                            | biological_process | 1360      |
| cellular process                                 | biological_process | 1639      |
| cellular component organization or<br>biogenesis | biological_process | 694       |
| extracellular region part                        | cellular_component | 266       |
| membrane                                         | cellular_component | 644       |
| protein-containing complex                       | cellular_component | 720       |
| membrane part                                    | cellular_component | 750       |
| organelle part                                   | cellular_component | 1090      |
| organelle                                        | cellular_component | 1269      |
| cell part                                        | cellular_component | 1925      |
| molecular function regulator                     | molecular_function | 242       |
| catalytic activity                               | molecular_function | 732       |
| binding                                          | molecular_function | 1720      |

Table S4: Top 20 summary table of KEGG annotation analysis results

| First category         | Second category                             | Number of genes |
|------------------------|---------------------------------------------|-----------------|
| Cellular Processes     | Cell growth and death                       | 26              |
|                        | Cell motility                               | 128             |
| Environmental          | Signaling molecules and interaction         | 107             |
|                        | Signal transduction                         | 241             |
| Information Processing | Membrane transport                          | 10              |
|                        | Translation                                 | 28              |
| Genetic Information    | Transcription                               | 21              |
|                        | Replication and repair                      | 64              |
| Processing             | Folding, sorting and degradation            | 36              |
|                        | Xenobiotics biodegradation and metabolism   | 27              |
|                        | Nucleotide metabolism                       | 30              |
|                        | Metabolism of terpenoids and polyketides    | 3               |
|                        | Metabolism of other amino acids             | 15              |
|                        | Metabolism of cofactors and vitamins        | 25              |
|                        | Lipid metabolism                            | 39              |
|                        | Glycan biosynthesis and metabolism          | 25              |
|                        | Energy metabolism                           | 11              |
|                        | Carbohydrate metabolism                     | 43              |
|                        | Biosynthesis of other secondary metabolites | 2               |
|                        | Amino acid metabolism                       | 35              |

Table S5: Summary of photoaging-related pathway genes

| Gene Num | Description                | Pvalue      | Padjust     |
|----------|----------------------------|-------------|-------------|
| 27       | DNA replication            | 8.63E-21    | 2.79E-18    |
| 45       | Cell cycle                 | 1.38E-14    | 2.22E-12    |
| 26       | p53 signaling pathway      | 5.05E-09    | 2.72E-07    |
| 41       | Calcium signaling pathway  | 7.68E-06    | 0.000225424 |
| 24       | ECM-receptor interaction   | 7.07E-06    | 0.000228256 |
| 83       | Pathways in cancer         | 0.000211641 | 0.004021175 |
| 32       | Cellular senescence        | 0.001332357 | 0.017214056 |
| 55       | PI3K-Akt signaling pathway | 0.001605322 | 0.019943042 |
| 26       | Apoptosis                  | 0.001897709 | 0.022702227 |
| 22       | TNF signaling pathway      | 0.004039141 | 0.03953462  |
| 17       | AGE-RAGE signaling         | 0.034559088 | 0.186043091 |

| pathway in diabetic complications |                            |             |             |
|-----------------------------------|----------------------------|-------------|-------------|
| 41                                | MAPK signaling pathway     | 0.036046883 | 0.1908712   |
| 16                                | TGF-beta signaling pathway | 0.03929143  | 0.198298934 |
